# Supplementary material for: Safety and efficacy of transcarotid artery revascularisation versus carotid endarterectomy: protocol for a systematic review and meta-analysis study
Source: PubMed Central journal article supplement — BMJ Open. 2021 May 4;11(5):e043039. doi: 10.1136/bmjopen-2020-043039 (PMC8098965; doi:10.1136/bmjopen-2020-043039), 2021-05-04
Supplement: bmjopen-2020-043039.draft_revisions.pdf [file bmjopen-2020-043039.draft_revisions.pdf]

# BMJ Open

BMJ Open is committed to open peer review. As part of this commitment we make the peer review history of every article we publish publicly available.

When an article is published we post the peer reviewers' comments and the authors' responses online. We also post the versions of the paper that were used during peer review. These are the versions that the peer review comments apply to.

The versions of the paper that follow are the versions that were submitted during the peer review process. They are not the versions of record or the final published versions. They should not be cited or distributed as the published version of this manuscript.

BMJ Open is an open access journal and the full, final, typeset and author-corrected version of record of the manuscript is available on our site with no access controls, subscription charges or pay-per-view fees (<http://bmjopen.bmj.com>).

If you have any questions on BMJ Open's open peer review process please email [info.bmjopen@bmj.com](mailto:info.bmjopen@bmj.com)

# BMJ Open

## Safety and Efficacy of Transcarotid Artery Revascularization Versus Carotid Endarterectomy: protocol for a systematic review and meta-analysis

|                               |                                                                                                                                                                                                                                                                                                                                                                                                                                                                                                                                                                                                                                                                                                                                                                                                                                                                                                                                                                                                                                                                                        |
|-------------------------------|----------------------------------------------------------------------------------------------------------------------------------------------------------------------------------------------------------------------------------------------------------------------------------------------------------------------------------------------------------------------------------------------------------------------------------------------------------------------------------------------------------------------------------------------------------------------------------------------------------------------------------------------------------------------------------------------------------------------------------------------------------------------------------------------------------------------------------------------------------------------------------------------------------------------------------------------------------------------------------------------------------------------------------------------------------------------------------------|
| Journal:                      | <i>BMJ Open</i>                                                                                                                                                                                                                                                                                                                                                                                                                                                                                                                                                                                                                                                                                                                                                                                                                                                                                                                                                                                                                                                                        |
| Manuscript ID                 | bmjopen-2020-043039                                                                                                                                                                                                                                                                                                                                                                                                                                                                                                                                                                                                                                                                                                                                                                                                                                                                                                                                                                                                                                                                    |
| Article Type:                 | Protocol                                                                                                                                                                                                                                                                                                                                                                                                                                                                                                                                                                                                                                                                                                                                                                                                                                                                                                                                                                                                                                                                               |
| Date Submitted by the Author: | 22-Jul-2020                                                                                                                                                                                                                                                                                                                                                                                                                                                                                                                                                                                                                                                                                                                                                                                                                                                                                                                                                                                                                                                                            |
| Complete List of Authors:     | Bai, Xuesong; Xuanwu Hospital, Department of Neurosurgery; China International Neuroscience Institute (China-INI)<br>Zhang, Xiao; Xuanwu Hospital, Department of Neurosurgery; China International Neuroscience Institute (China-INI)<br>Yang, Wuyang; Johns Hopkins University School of Medicine, Neurosurgery<br>Wang, Tao; Xuanwu Hospital, Department of Neurosurgery; China International Neuroscience Institute (China-INI)<br>Wang, Yan; China Medical University, No.77 Puhe Road, Shenyang North New Area, Shenyang, Liaoning Province, P.R. China<br>Feng, Yao; Xuanwu Hospital, Department of Neurosurgery; China International Neuroscience Institute (China-INI)<br>Yang, Kun; Xuanwu Hospital, Department of Evidence-based Medicine<br>Wang, Xue; Xuanwu Hospital, Medical Library<br>Ma, Yan; Xuanwu Hospital, Department of Neurosurgery; China International Neuroscience Institute (China-INI)<br>Jiao, Liqun; Xuanwu Hospital, Department of Neurosurgery and Department of Interventional Neuroradiology; China International Neuroscience Institute (China-INI) |
| Keywords:                     | Stroke < NEUROLOGY, NEUROSURGERY, STROKE MEDICINE                                                                                                                                                                                                                                                                                                                                                                                                                                                                                                                                                                                                                                                                                                                                                                                                                                                                                                                                                                                                                                      |
|                               |                                                                                                                                                                                                                                                                                                                                                                                                                                                                                                                                                                                                                                                                                                                                                                                                                                                                                                                                                                                                                                                                                        |

SCHOLARONE™  
Manuscripts

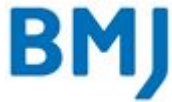

I, the Submitting Author has the right to grant and does grant on behalf of all authors of the Work (as defined in the below author licence), an exclusive licence and/or a non-exclusive licence for contributions from authors who are: i) UK Crown employees; ii) where BMJ has agreed a CC-BY licence shall apply, and/or iii) in accordance with the terms applicable for US Federal Government officers or employees acting as part of their official duties; on a worldwide, perpetual, irrevocable, royalty-free basis to BMJ Publishing Group Ltd ("BMJ") its licensees and where the relevant Journal is co-owned by BMJ to the co-owners of the Journal, to publish the Work in this journal and any other BMJ products and to exploit all rights, as set out in our [licence](#).

The Submitting Author accepts and understands that any supply made under these terms is made by BMJ to the Submitting Author unless you are acting as an employee on behalf of your employer or a postgraduate student of an affiliated institution which is paying any applicable article publishing charge ("APC") for Open Access articles. Where the Submitting Author wishes to make the Work available on an Open Access basis (and intends to pay the relevant APC), the terms of reuse of such Open Access shall be governed by a Creative Commons licence – details of these licences and which [Creative Commons](#) licence will apply to this Work are set out in our licence referred to above.

Other than as permitted in any relevant BMJ Author's Self Archiving Policies, I confirm this Work has not been accepted for publication elsewhere, is not being considered for publication elsewhere and does not duplicate material already published. I confirm all authors consent to publication of this Work and authorise the granting of this licence.

# Safety and Efficacy of Transcarotid Artery Revascularization Versus Carotid Endarterectomy: protocol for a systematic review and meta-analysis

Xuesong Bai<sup>1,2#</sup>, Xiao Zhang<sup>1,2#</sup>, Wuyang Yang<sup>3#</sup>, Tao Wang<sup>1,2</sup>, Yan Wang<sup>4</sup>, Yao Feng<sup>1,2</sup>, Kun Yang<sup>5</sup>, Xue Wang<sup>6</sup>, Yan Ma<sup>1,2\*</sup>, Liqun Jiao<sup>1,2,7\*</sup>

## \*Correspondence to

Liqun Jiao; e-mail: [liqunjiao@sina.cn](mailto:liqunjiao@sina.cn); telephone: +86-010-83198277; fax numbers: +86-010-83199233; China International Neuroscience Institute (China-INI); Department of Neurosurgery and Department of Interventional Neuroradiology, Xuanwu Hospital, Capital Medical University, No. 45 Changchun Street, Xicheng District, Beijing, China (100053).

Yan Ma; e-mail: [leavesyan@sina.com](mailto:leavesyan@sina.com); telephone: +86-010-83198277; fax numbers: +86-010-83199233; China International Neuroscience Institute (China-INI); Department of Neurosurgery, Xuanwu Hospital, Capital Medical University, No. 45 Changchun Ave, Xicheng District, Beijing, China (100053).

<sup>1</sup> China International Neuroscience Institute (China-INI), Beijing, China

<sup>2</sup> Department of Neurosurgery, Xuanwu Hospital, Capital Medical University, No. 45 Changchun Street, Beijing, China

<sup>3</sup> Department of Neurosurgery, Johns Hopkins University School of Medicine, Baltimore, USA

<sup>4</sup> China Medical University, No.77 Puhe Road, Shenyang North New Area, Shenyang, Liaoning Province, China

<sup>5</sup> Department of Evidence-Based Medicine, Xuanwu Hospital, Capital Medical University, No. 45 Changchun Street, Beijing, China

<sup>6</sup> Medical Library, Xuanwu Hospital, Capital Medical University, No. 45 Changchun Street, Beijing, China

<sup>7</sup> Department of Interventional Neuroradiology, Xuanwu Hospital, Capital Medical University, Beijing, China

# These authors contributed equally to this article and are co-first authors.

**Word count: 2199**

## ABSTRACT

**Introduction** In recent years, transcarotid artery revascularization (TCAR) with flow reversal has been developed to treat carotid artery stenosis. The superiority of TCAR over transfemoral carotid artery stenting (TFCAS) has been demonstrated. However, the safety and efficacy between TCAR and carotid endarterectomy (CEA) remains uncertain. This study aims to introduce a protocol for a systemic review and meta-analysis to compare the morbidity and mortality rates between TCAR and CEA in treating atherosclerotic carotid artery stenosis.

**Methods and analysis** This protocol was conducted in term of the Preferred Reporting Items for Systematic Reviews and Meta-Analysis Protocols (PRISMA-P) statement. Major databases will be searched, including Medline, Web of Science, Embase, and the Cochrane Library. Randomized controlled trials and high-quality observational studies will be included. We will screen the studies published from January 2000 to March 2021. Bias risk will be evaluated with usage of the Cochrane Collaboration criteria or Newcastle–Ottawa Scale depending on the study type. Two reviewers will select eligible studies and extract data independently. The primary outcome will include stroke or death during perioperative period and follow-up.  $I^2$  statistic will be used for evaluation of heterogeneity. Subgroup analysis and sensitivity analysis will be performed to explore any potential sources of heterogeneity. Specific results will be described in narrative form when available eligible studies are not enough for meta-analysis. Publication bias will be assessed by performing a funnel plot.

**Ethics and dissemination** This study will summarize and analyze the existing literature, so ethics approval will not be required. The final results may be published at relevant academic conference or journal.

**PROSPERO registration number** 42020178691

**Keywords** carotid artery stenosis, transcarotid artery revascularization, carotid endarterectomy, systematic review, meta-analysis

**Strengths and limitations of this study**

- This systemic review and meta-analysis will summarize the current literatures and compare both primary and secondary outcomes between TCAR and CEA
- This study will also compare the outcomes based on studies eliminating baseline discrepancy of comorbidities and anatomic factors
- Observational studies will be included, with the aim of providing adequate statistical power when evaluating primary and secondary outcomes
- Inclusion of observational studies will increase the bias risk, but our assessments and methods will be meticulous to ensure the accuracy of our results
- Subgroup and sensitivity analyses will be conducted if level of heterogeneity is high

## INTRODUCTION

Stroke is a major cause of mortality and morbidity globally,<sup>1</sup> and carotid artery disease is the major pathophysiology process leading to stroke.<sup>2</sup> Carotid endarterectomy (CEA) has been the golden standard surgical intervention to treat atherosclerotic carotid artery stenosis for many decades.<sup>2 3</sup> With rapid development of endovascular techniques, carotid artery stenting (CAS) has been considered as a less invasive intervention and an effective alternative of CEA. However, during traditional approach with transfemoral carotid artery stenting (TFCAS), sheath position distal to common carotid artery (CCA) is often required for placement of embolic protection devices (EPDs). This approach entails traversing the aorta, aortic arch, and the culprit lesion at CCA bifurcation crossed by a wire and EPD delivery catheter, which may increase the risk of plaque rupture and result in emboli shower during distal access.<sup>4</sup> Thus, TFCAS might paradoxically lead to a higher peri-procedural stroke risk compared to CEA.<sup>2 5</sup>

In recent years, the new technique of transcarotid artery revascularization (TCAR) with flow reversal has been developed to treat carotid artery stenosis.<sup>4 6-8</sup> TCAR is performed through direct carotid access via a small incision at the base of the neck. This cervical approach has many advantages - it avoids catheter manipulation in the aortic arch, supra-aortic vessels, and CCA, thereby decreasing risk of cerebral emboli. Additionally, it uses flow reversal system to synergistically reduce perioperative embolic stroke risks. With the aforementioned advantages, the superiority of TCAR over TFCAS has been clearly demonstrated in a series of studies.<sup>8 9</sup>

Nevertheless, high-level evidence regarding outcome comparison between TCAR and CEA, which is the golden standard of treatment of carotid stenosis, is lacking. Although previous meta-analyses showed TCAR had similar 30-day risk of stroke/myocardial infarction(MI)/death and a significantly lower risk of cranial nerve injury (CNI) when compared with CEA,<sup>10 11</sup> the evidence was synthesized in the context of limited number of studies and lack of long-term results. Since the last meta-analysis, numerous new studies with long-term outcomes have been published, which warrants a repeat systematic review incorporating those results.<sup>8 12</sup> Also, TCAR were shown with shorter operative time than CEA in some studies,<sup>4 12 13</sup> but this was not analyzed in both meta-analyses.<sup>10 11</sup> In addition, as patients were usually considered for TCAR when they were regarded as high risk CEA candidates due to comorbidities such as chronic renal disease or coronary artery disease,<sup>10</sup> thus the results of previous meta-analyses could not be generalized to patients with standard surgical risk.<sup>10 11</sup> Therefore, the comparative safety and efficacy between TCAR and CEA needs to be further analyzed based on studies with acceptable treatment equipoise between the two interventions.<sup>4 12</sup>

This systemic review and meta-analysis will summarize the current literatures and compare both primary and secondary outcomes between the two modalities in treatment

of atherosclerosis carotid artery stenosis. We anticipate provision of valuable clinical evidence for decision-making process in treatment selection for carotid artery stenosis patients.

## METHODS AND ANALYSIS

The registration of this systematic review and meta-analysis has been completed in the International Prospective Register of Systematic Reviews (PROSPERO registration number: CRD 42020178691). This protocol was conducted in term of the Preferred Reporting Items for Systematic Review and Meta-Analysis Protocols (PRISMA-P) (Supplement Table 1).<sup>14</sup> If any changes were made to this protocol, PROSPERO registration information will be updated in a timely fashion.

### **Inclusion criteria for selecting study**

#### *Participants*

We will include adult participants (age  $\geq 18$  years old) with atherosclerotic carotid artery stenosis, which were diagnosed by carotid ultrasound, Computed Tomography Angiography (CTA), Magnetic Resonance Angiography (MRA) or Digital Subtraction Angiography (DSA), and treated with TCAR or CEA. We will exclude participants when one of the following criteria is met: aged under 18 years; carotid artery stenosis due to nonatherosclerotic etiologies, such as vasculitis, radiation, vasospasm and fibromuscular dysplasia; missing or unclear clinical, imaging, or follow-up data.

#### *Primary Intervention of Interest*

The primary intervention of interest will be TCAR with flow reversal for atherosclerotic carotid artery stenosis. TCAR is a type of CAS performed through direct carotid access via a small incision at the base of the neck. Micropuncture set is used to perform arterial puncture, then guidewire and arterial sheath will pass through it. Venous access could be used by common femoral vein or internal jugular vein.<sup>15 16</sup> Then, the common femoral vein will be punctured and sheath insertion will be performed. Connection of the sheaths with 'flow controller' is conducted to complete the circuit. The blood reversal is achieved by occlusion of the proximal to the arterial puncture site and the flow controller could regulate the blood flow.<sup>10 17</sup>

#### *Comparison Intervention*

The comparison intervention will be CEA, which contains primary closure CEA and eversion CEA, with or without shunt and arterioplasty.

#### *Outcome*

At least one of the following items is reported.

Primary outcomes:

1. Stroke or death during the perioperative (within 30 days) period
2. Stroke or death during follow-up (such as 1 year and 2 years) period



1  
2  
3 We will classify the causes of stroke or death into culprit lesion induced, non-culprit  
4 lesion induced, and non-vascular cause.  
5  
6

7 Secondary outcomes:

- 8  
9 1. Operative duration, CNI, myocardial infarction (MI), transient ischemic attacks  
10 (TIAs), hematoma and intracranial hemorrhage during perioperative period  
11 2. MI, TIAs, hematoma, intracranial hemorrhage and restenosis during follow-up  
12 period  
13  
14

### 15 *Studies*

16 Studies included in the systematic review will be randomized controlled trials (RCTs)  
17 and high-quality observational studies including case-control or cohort studies. The  
18 reason for inclusion of observational studies is to minimize type II error caused by lack  
19 of statistical power due to limited number of RCTs.<sup>5 18</sup> Conference abstracts, case  
20 reports and case series (no more than 10 patients) will be excluded.  
21  
22  
23

### 24 **Search strategy**

25 Literature search will be performed using the following main databases, including  
26 Medline, Embase, Web of Science, and the Cochrane Library. We will search and  
27 screen the studies published between January 2000 and March 2021. The explicit search  
28 strategy will be constructed for each database using the following related terms:  
29 “carotid artery stenosis”, “carotid endarterectomy”, “transcarotid artery”,  
30 “transcervical”, “revascularization”. Additionally, ClinicalTrials.gov will be searched  
31 for any ongoing studies to assure that we include all eligible data. The search strategy  
32 for Medline was drafted and revised in accordance with the standards of search  
33 strategies checklist<sup>19</sup> (Supplementary Table 2, Search strategy for Medline).  
34  
35  
36  
37

### 38 **Data selection and analysis**

#### 39 *Study selection*

40 Two independent reviewers (YW and XW) will screening all results after searching the  
41 databases for selection of eligible studies (see Figure 1. Study flow diagram). First,  
42 titles, key words and abstracts will be screened by reviewers, and they will rule out the  
43 irrelevant studies. Second, reviewers will evaluate eligible studies from the remaining  
44 studies by reading through the full articles. We will document the causes of all included  
45 and excluded studies. If conflicts result, reconciliation with consultation from a third  
46 reviewer (TW) will be sought.  
47  
48  
49  
50

#### 51 *Data extraction and management*

52 EndNote X7 (Clarivate Analytics, Philadelphia, USA) will be used to manage included  
53 studies. The data extraction will be independently conducted by two reviewers (YW  
54 and XW) on the basis of a standardized data extraction form.<sup>20</sup> The extracted  
55 information is as follows:  
56  
57

- 58 1. Study characteristics: type of study, authors, year of publication, location, sample  
59 size, number of procedures  
60

2. Patient characteristics: mean age, age range, gender, medical history, symptom status, anatomic characteristics
3. Operative characteristics: type of treatment, anesthesia type and the use of anticoagulation
4. Data of outcomes: number of cases with aforementioned outcomes, number of participants and follow-up time

Discrepancy in data extraction between two reviewers will be settled by a discussion. For missing or unclear information, we will try to contact the corresponding authors via email. If no responses after two emails, we will exclude this study for meta-analysis and record this case in the PRISMA flow chart.

#### *Bias risk assessment*

Two independent reviewers (YW and KY) will assess the bias risk of included studies. Cochrane Collaboration criteria and Newcastle-Ottawa scale will be performed for assessing the bias risk of RCTs and observational studies, respectively.<sup>21 22</sup> The Methodological Quality and Synthesis of Case Series and Case Reports will be used for case series.<sup>23</sup> Each domain of included studies will be given a score based on the bias risk. The level of bias risk will be ranked as high, unclear or low. Any disagreements will be discussed by the two reviewing authors and a group discussion will be organized if necessary.

#### *Heterogeneity assessment*

$\chi^2$  test and  $I^2$  statistic will be used for measuring the heterogeneity before any outcome is pooled.<sup>24 25</sup>  $I^2$  statistic  $> 60\%$  will be determined as having substantial heterogeneity, and the  $I^2$  statistics  $< 40\%$  and  $40\%–60\%$  will be considered as mild and moderate heterogeneity.<sup>26</sup>

#### *Measures of treatment effect and data synthesis*

Both primary and secondary outcomes between TCAR and CEA will be compared not only based on all eligible included studies, but also on studies eliminating baseline discrepancy of comorbidities and anatomic factors to minimize selection bias.

If effect size is sufficient (more than 2 included studies), meta-analyses will be performed for pooled results of included studies. Odds ratio (OR) with 95% confidence intervals (CIs) will be used to present the treatment effect for outcomes reported in dichotomous form. For continuous data, we will report in mean differences with 95% CIs. The level of statistical significance is  $p < 0.05$ . The fixed-effects model will be applied when there is mild or moderate evidence of heterogeneity ( $I^2 \leq 60\%$ ). On the contrary, the random-effects model will be used in studies with substantial heterogeneity ( $I^2 > 60\%$ ).<sup>27</sup> If there is substantial heterogeneity and sufficient studies, subgroup analyses will be performed to examine the potential sources of heterogeneity by symptomatic or asymptomatic patients. Sensitivity analysis is also utilized to appreciate studies with high risk of bias through step-wise exclusion of studies and

1  
2  
3 observation of combined bias in remaining studies. In case that data is insufficient and  
4 meta-analysis is infeasible, the solely narrative presentation of study results will be  
5 presented. The STATA (version 14, StataCorp LLC, USA) will be used as a tool for all  
6 statistical analysis.  
7  
8  
9

#### 10 *Publication bias assessment*

11 The trail protocols will be checked for assessing publication bias of eligible studies.  
12 Provided that more than 10 studies are included, publication bias will be assessed by  
13 visualization of funnel plot.  
14  
15

#### 16 *Assessment of pooled effect estimates*

17 For pooled effect estimates, we will use the Strengthening the Reporting of  
18 Observational Studies in Epidemiology (STROBE) statement<sup>28</sup> and the Grading of  
19 Recommendations Assessment, Development and Evaluation (GRADE) system for  
20 assessment of observational studies and RCTs, respectively.<sup>29</sup>  
21  
22  
23

#### 24 **Patient and public involvement**

25 Patient and public will not be involved in the process of this systematic review and  
26 meta-analysis because this study will be conducted on the basis of published data.  
27  
28  
29

## 30 **DISCUSSION**

31 This study aims to summarize the current literatures and compare both primary and  
32 secondary outcomes between TCAR and CEA in treating atherosclerotic carotid artery  
33 stenosis. TCAR with flow reversal was recently developed to treat carotid artery  
34 stenosis. However, the safety and efficacy between TCAR and the golden therapy of  
35 CEA remains uncertain. Also, a systemic and meta-analysis of high-quality based on  
36 studies eliminating the baseline discrepancy of comorbidities and anatomic factors will  
37 be performed for decision-making process for carotid artery stenosis patients.  
38  
39  
40  
41  
42  
43  
44

## 45 **ETHICS AND DISSEMINATION**

46 There is no need for ethical approval because primary data will not be obtained. The  
47 systematic review will be presented at international conferences and published in peer-  
48 reviewed journals.  
49  
50  
51

52 **Abbreviations:** CEA, Carotid endarterectomy; CAS, carotid artery stenting; TFCAS, transfemoral  
53 carotid artery stenting; CCA, common carotid artery; EPDs, embolic protection devices; TCAR,  
54 transcarotid artery revascularization; CNI, cranial nerve injury; PROSPERO, International  
55 Prospective Register of Systematic Reviews; PRISMA-P, Preferred Reporting Items for Systematic  
56 Reviews and Meta-Analysis Protocols; PICO, Population Intervention Comparison Outcome; CTA,  
57 computed tomography angiography; MRA, magnetic resonance angiography; DSA, digital  
58  
59  
60

1  
2  
3 subtraction angiography; MI, myocardial infarction; TIAs, transient ischemic attacks; RCTs,  
4 randomized controlled trials; OR, odds ratio; CIs, confidence intervals; STROBE, Strengthening  
5 the Reporting of Observational Studies in Epidemiology statement; GRADE, Grading of  
6 Recommendations Assessment, Development and Evaluation system.  
7  
8

9  
10 **Contributors** XB, XZ, LJ and YM contributed to the initial idea for this study. XW, TW, YW and  
11 YF developed and revised the search strategy. XB, XZ, and WY completed the study design. LJ and  
12 YM contributed to consults about clinical issues. XB, XZ and WY contributed to the original draft.  
13 LJ, YM, XB, XZ, WY, TW and KY contributed to the revision of the draft. XB, XZ and WY  
14 contributed equally to this article. All of the authors approved the final work prior to submission.  
15  
16

17  
18 **Funding statement** This work was supported by the Ministry of Science and Technology of the  
19 People's Republic of China (2016YFC1301700). The funder has no role in study design, data  
20 analysis and writing the manuscript.  
21  
22

23 **Competing interests** None declared.  
24

25 **Patient consent** Not required.  
26  
27  
28  
29  
30  
31  
32  
33  
34  
35  
36  
37  
38  
39  
40  
41  
42  
43  
44  
45  
46  
47  
48  
49  
50  
51  
52  
53  
54  
55  
56  
57  
58  
59  
60

## REFERENCES

1. Powers WJ, Rabinstein AA, Ackerson T, et al. 2018 Guidelines for the Early Management of Patients With Acute Ischemic Stroke: A Guideline for Healthcare Professionals From the American Heart Association/American Stroke Association. *Stroke* 2018;49(3):e46-e110.
2. Carotid artery stenting compared with endarterectomy in patients with symptomatic carotid stenosis (International Carotid Stenting Study): an interim analysis of a randomised controlled trial. *The Lancet* 2010;375(9719):985-97.
3. Feng Y, Bai X, Wang T, et al. Thirty-day outcomes of carotid endarterectomy in the elderly: A 17-year single-center study. *J Clin Neurosci* 2020.
4. Kashyap VS, King AH, Foteh MI, et al. A multi-institutional analysis of transcarotid artery revascularization compared to carotid endarterectomy. *Journal of vascular surgery* 2019;70(1):123-29.
5. Feng Y, Li L, Bai X, et al. Risk factors for new ischaemic cerebral lesions after carotid artery stenting: protocol for a systematic review and meta-analysis. *BMJ open* 2019;9(8):e030025.
6. Alvarez B, Ribo M, Maeso J, et al. Transcervical carotid stenting with flow reversal is safe in octogenarians: a preliminary safety study. *J Vasc Surg* 2008;47(1):96-100.
7. Plessers M, Van Herzeele I, Hemelsoet D, et al. Transcervical Carotid Stenting With Dynamic Flow Reversal Demonstrates Embolization Rates Comparable to Carotid Endarterectomy. *J Endovasc Ther* 2016;23(2):249-54.
8. Dakour-Aridi H, Kashyap VS, Wang GJ, et al. The impact of age on in-hospital outcomes

- 1  
2  
3  
4 after transcarotid artery revascularization, transfemoral carotid artery stenting, and carotid  
5  
6 endarterectomy. *Journal of vascular surgery* 2020.  
7  
8  
9 9. Schermerhorn ML, Liang P, Eldrup-Jorgensen J, et al. Association of Transcarotid Artery  
10  
11 Revascularization vs Transfemoral Carotid Artery Stenting With Stroke or Death Among  
12  
13 Patients With Carotid Artery Stenosis. *JAMA* 2019;322(23):2313-22.  
14  
15  
16  
17 10. Conway AM, Nguyen Tran NT, Qato K, et al. Complexity of aortic arch anatomy affects the  
18  
19 outcomes of transcarotid artery revascularization versus transfemoral carotid artery stenting.  
20  
21 *Ann Vasc Surg* 2020.  
22  
23  
24  
25 11. Naazie IN, Cui CL, Osaghae I, et al. A Systematic Review and Meta-Analysis of  
26  
27 Transcarotid Artery Revascularization with Dynamic Flow Reversal Versus Transfemoral  
28  
29 Carotid Artery Stenting and Carotid Endarterectomy. *Annals of vascular surgery* 2020.  
30  
31  
32  
33 12. Yee EJ, Wang SK, Timsina LR, et al. Propensity-Matched Outcomes of Transcarotid Artery  
34  
35 Revascularization Versus Carotid Endarterectomy. *The Journal of surgical research*  
36  
37 2020;252:22-29.  
38  
39  
40  
41 13. Schermerhorn ML, Liang P, Dakour-Aridi H, et al. In-hospital outcomes of transcarotid  
42  
43 artery revascularization and carotid endarterectomy in the Society for Vascular Surgery  
44  
45 Vascular Quality Initiative. *Journal of vascular surgery* 2020;71(1):87-95.  
46  
47  
48  
49 14. Shamseer L, Moher D, Clarke M, et al. Preferred reporting items for systematic review and  
50  
51 meta-analysis protocols (PRISMA-P) 2015: elaboration and explanation. *BMJ (Clinical*  
52  
53 *research ed)* 2015;350:g7647.  
54  
55  
56  
57 15. Matas M, Alvarez B, Ribo M, et al. Transcervical carotid stenting with flow reversal  
58  
59 protection: experience in high-risk patients. *J Vasc Surg* 2007;46(1):49-54.  
60

- 1  
2  
3  
4 16. Leal I, Orgaz A, Flores A, et al. A diffusion-weighted magnetic resonance imaging-based  
5  
6 study of transcervical carotid stenting with flow reversal versus transfemoral filter protection.  
7  
8  
9 *J Vasc Surg* 2012;56(6):1585-90.  
10  
11  
12 17. Luk Y, Chan YC, Cheng SW. Transcarotid Artery Revascularization as a New Modality of  
13  
14 Treatment for Carotid Stenosis. *Annals of vascular surgery* 2020;64:397-404.  
15  
16  
17 18. Bai X, Feng Y, Yang K, et al. Extracranial-intracranial bypass surgery for occlusive  
18  
19 atherosclerotic disease of the anterior cerebral circulation: protocol for a systematic review  
20  
21 and meta-analysis. *Systematic reviews* 2020;9(1):70.  
22  
23  
24 19. Wang T, Wang X, Yang K, et al. Endovascular treatment for symptomatic intracranial artery  
25  
26 stenosis: protocol for a systematic review and network meta-analysis. *BMJ open*  
27  
28 2018;8(7):e022359.  
29  
30  
31  
32 20. Bai X, Feng Y, Li L, et al. Treatment strategies for asymptomatic carotid artery stenosis in  
33  
34 the era of lipid-lowering drugs: protocol for a systematic review and network meta-analysis.  
35  
36  
37 *BMJ open* 2020;10(7):e035094.  
38  
39  
40 21. Higgins J, Green S. Cochrane Handbook for Systematic Reviews of Interventions, Version  
41  
42 5.1.0. The Cochrane Collaboration. 2013  
43  
44  
45 22. Wells GA, Shea B, O'Connell J. The Newcastle-Ottawa Scale (NOS) for Assessing The  
46  
47 Quality of Nonrandomised Studies in Meta-analyses. 2014  
48  
49  
50 23. Murad MH, Sultan S, Haffar S, et al. Methodological quality and synthesis of case series  
51  
52 and case reports. *BMJ evidence-based medicine* 2018;23(2):60-63.  
53  
54  
55 24. Higgins JP, Thompson SG, Deeks JJ, et al. Measuring inconsistency in meta-analyses.  
56  
57  
58 *BMJ (Clinical research ed)* 2003;327(7414):557-60.  
59  
60

- 1  
2  
3  
4 25. Higgins JP, Thompson SG. Quantifying heterogeneity in a meta-analysis. *Statistics in*  
5  
6 *medicine* 2002;21(11):1539-58.  
7  
8  
9 26. Zhang X, Yu Y, Yang K, et al. Clinical outcomes of radiation-induced carotid stenosis: A  
10  
11 systematic review and meta-analysis. *Journal of stroke and cerebrovascular diseases : the*  
12  
13 *official journal of National Stroke Association* 2020;29(8):104929.  
14  
15  
16 27. Cheung MW, Vijayakumar R. A Guide to Conducting a Meta-Analysis. *Neuropsychology*  
17  
18 *review* 2016;26(2):121-8.  
19  
20  
21 28. von Elm E, Altman DG, Egger M, et al. Strengthening the Reporting of Observational  
22  
23 Studies in Epidemiology (STROBE) statement: guidelines for reporting observational studies.  
24  
25 *BMJ (Clinical research ed)* 2007;335(7624):806-8.  
26  
27  
28 29. Guyatt GH, Oxman AD, Vist GE, et al. GRADE: an emerging consensus on rating quality  
29  
30 of evidence and strength of recommendations. *BMJ (Clinical research ed)*  
31  
32 2008;336(7650):924-6.  
33  
34  
35  
36  
37  
38  
39  
40  
41  
42  
43  
44  
45  
46  
47  
48  
49  
50  
51  
52  
53  
54  
55  
56  
57  
58  
59  
60



1  
2  
3  
4  
5  
6  
7  
8  
9  
10  
11  
12  
13  
14  
15  
16  
17  
18  
19  
20  
21  
22  
23  
24  
25  
26  
27  
28  
29  
30  
31  
32  
33  
34  
35  
36  
37  
38  
39  
40  
41  
42  
43  
44  
45  
46  
47  
48  
49  
50  
51  
52  
53  
54  
55  
56  
57  
58  
59  
60

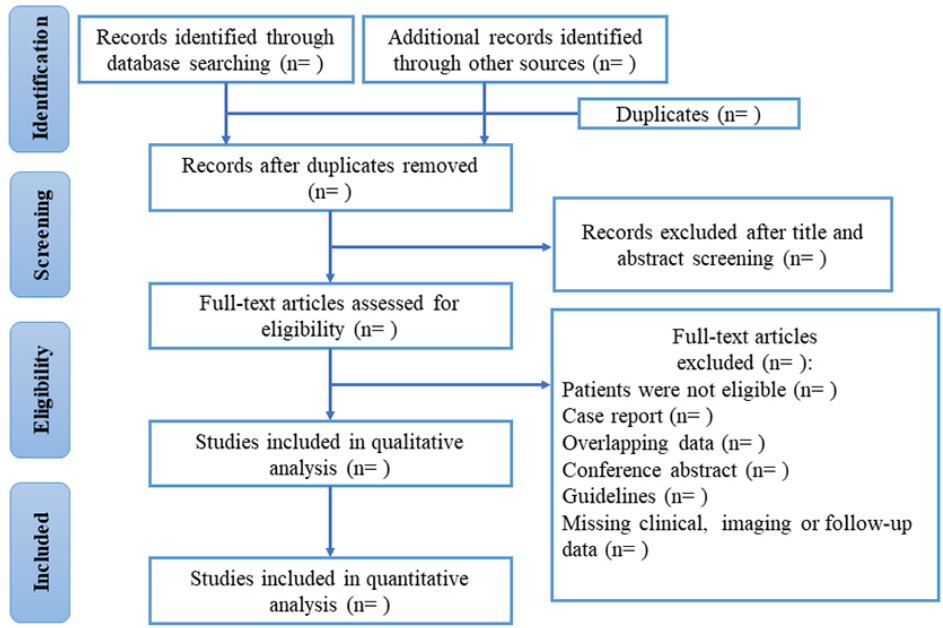

Flow diagram of literature for systematic review and meta-analysis.

75x56mm (300 x 300 DPI)

**Supplementary file 1.** PRISMA-P (Preferred Reporting Items for Systematic review and Meta-Analysis Protocols) 2015 checklist: recommended items to address in a systematic review protocol\*

| Section and topic                 | Item No | Checklist item                                                                                                                                                                                  | Check results                                                                      |
|-----------------------------------|---------|-------------------------------------------------------------------------------------------------------------------------------------------------------------------------------------------------|------------------------------------------------------------------------------------|
| <b>ADMINISTRATIVE INFORMATION</b> |         |                                                                                                                                                                                                 |                                                                                    |
| Title:                            |         |                                                                                                                                                                                                 | P1, L1-3                                                                           |
| Identification                    | 1a      | Identify the report as a protocol of a systematic review                                                                                                                                        | Yes                                                                                |
|                                   | Update  | 1b                                                                                                                                                                                              | If the protocol is for an update of a previous systematic review, identify as such |
| Registration                      | 2       | If registered, provide the name of the registry (such as PROSPERO) and registration number                                                                                                      | Yes<br>P2, L25                                                                     |
| Authors:                          |         |                                                                                                                                                                                                 |                                                                                    |
| Contact                           | 3a      | Provide name, institutional affiliation, e-mail address of all protocol authors; provide physical mailing address of corresponding author                                                       | Yes<br>P1, L4-32                                                                   |
| Contributions                     | 3b      | Describe contributions of protocol authors and identify the guarantor of the review                                                                                                             | Yes<br>P9, L3-7                                                                    |
| Amendments                        | 4       | If the protocol represents an amendment of a previously completed or published protocol, identify as such and list changes; otherwise, state plan for documenting important protocol amendments | Yes                                                                                |
| Support:                          |         |                                                                                                                                                                                                 | P9, L9-11                                                                          |
| Sources                           | 5a      | Indicate sources of financial or other support for the review                                                                                                                                   | Yes                                                                                |
| Sponsor                           | 5b      | Provide name for the review funder and/or sponsor                                                                                                                                               | Yes                                                                                |

|    |                     |     |                                                                                                                                                                                                                               |             |
|----|---------------------|-----|-------------------------------------------------------------------------------------------------------------------------------------------------------------------------------------------------------------------------------|-------------|
| 1  |                     |     |                                                                                                                                                                                                                               |             |
| 2  |                     |     |                                                                                                                                                                                                                               |             |
| 3  |                     |     |                                                                                                                                                                                                                               |             |
| 4  | Role of             | 5c  | Describe roles of funder(s), sponsor(s), and/or institution(s), if any, in developing the protocol                                                                                                                            | Yes         |
| 5  | sponsor or          |     |                                                                                                                                                                                                                               |             |
| 6  | funder              |     |                                                                                                                                                                                                                               |             |
| 7  | <hr/>               |     |                                                                                                                                                                                                                               |             |
| 8  | <b>INTRODUCTION</b> |     |                                                                                                                                                                                                                               |             |
| 9  | <hr/>               |     |                                                                                                                                                                                                                               |             |
| 10 | Rationale           | 6   | Describe the rationale for the review in the context of what is already known                                                                                                                                                 | Yes         |
| 11 |                     |     |                                                                                                                                                                                                                               | P4, L2-38   |
| 12 | <hr/>               |     |                                                                                                                                                                                                                               |             |
| 13 | Objectives          | 7   | Provide an explicit statement of the question(s) the review will address with reference to participants, interventions, comparators, and outcomes (PICO)                                                                      | Yes         |
| 14 |                     |     |                                                                                                                                                                                                                               | P4, L40-P5, |
| 15 |                     |     |                                                                                                                                                                                                                               | L1          |
| 16 | <hr/>               |     |                                                                                                                                                                                                                               |             |
| 17 | <b>METHODS</b>      |     |                                                                                                                                                                                                                               |             |
| 18 | <hr/>               |     |                                                                                                                                                                                                                               |             |
| 19 | Eligibility         | 8   | Specify the study characteristics (such as PICO, study design, setting, time frame) and report characteristics (such as years considered, language, publication status) to be used as criteria for eligibility for the review | Yes         |
| 20 | criteria            |     |                                                                                                                                                                                                                               | P5, L3- P6, |
| 21 |                     |     |                                                                                                                                                                                                                               | L12         |
| 22 | <hr/>               |     |                                                                                                                                                                                                                               |             |
| 23 | Information         | 9   | Describe all intended information sources (such as electronic databases, contact with study authors, trial registers or other grey literature sources) with planned dates of coverage                                         | Yes         |
| 24 | sources             |     |                                                                                                                                                                                                                               | P6, L14-    |
| 25 |                     |     |                                                                                                                                                                                                                               | L23         |
| 26 | <hr/>               |     |                                                                                                                                                                                                                               |             |
| 27 | Search strategy     | 10  | Present draft of search strategy to be used for at least one electronic database, including planned limits, such that it could be repeated                                                                                    | Yes         |
| 28 |                     |     |                                                                                                                                                                                                                               | Supplement  |
| 29 |                     |     |                                                                                                                                                                                                                               | ary Table 2 |
| 30 | <hr/>               |     |                                                                                                                                                                                                                               |             |
| 31 | Study records:      |     |                                                                                                                                                                                                                               |             |
| 32 |                     |     |                                                                                                                                                                                                                               |             |
| 33 | Data                | 11a | Describe the mechanism(s) that will be used to manage records and data throughout the review                                                                                                                                  | Yes         |
| 34 | managem             |     |                                                                                                                                                                                                                               | P6, L36-    |
| 35 | ent                 |     |                                                                                                                                                                                                                               | L37         |
| 36 |                     |     |                                                                                                                                                                                                                               |             |
| 37 | Selection           | 11b | State the process that will be used for selecting studies (such as two independent reviewers) through each phase of the review (that is, screening, eligibility and inclusion in meta-analysis)                               | Yes         |
| 38 | process             |     |                                                                                                                                                                                                                               | P6, L26-33  |
| 39 |                     |     |                                                                                                                                                                                                                               |             |
| 40 |                     |     |                                                                                                                                                                                                                               |             |
| 41 |                     |     |                                                                                                                                                                                                                               |             |
| 42 |                     |     |                                                                                                                                                                                                                               |             |
| 43 |                     |     |                                                                                                                                                                                                                               |             |
| 44 |                     |     |                                                                                                                                                                                                                               |             |
| 45 |                     |     |                                                                                                                                                                                                                               |             |
| 46 |                     |     |                                                                                                                                                                                                                               |             |

|                                    |     |                                                                                                                                                                                                                                                  |                       |
|------------------------------------|-----|--------------------------------------------------------------------------------------------------------------------------------------------------------------------------------------------------------------------------------------------------|-----------------------|
| Data collection process            | 11c | Describe planned method of extracting data from reports (such as piloting forms, done independently, in duplicate), any processes for obtaining and confirming data from investigators                                                           | Yes<br>P6, L37-L38    |
| Data items                         | 12  | List and define all variables for which data will be sought (such as PICO items, funding sources), any pre-planned data assumptions and simplifications                                                                                          | Yes<br>P6, L38-P7, L8 |
| Outcomes and prioritization        | 13  | List and define all outcomes for which data will be sought, including prioritization of main and additional outcomes, with rationale                                                                                                             | Yes<br>P5, L36-P6, L5 |
| Risk of bias in individual studies | 14  | Describe anticipated methods for assessing risk of bias of individual studies, including whether this will be done at the outcome or study level, or both; state how this information will be used in data synthesis                             | Yes<br>P7, L10-18     |
| Data synthesis                     | 15a | Describe criteria under which study data will be quantitatively synthesized                                                                                                                                                                      | Yes<br>P7, L27-32     |
|                                    | 15b | If data are appropriate for quantitative synthesis, describe planned summary measures, methods of handling data and methods of combining data from studies, including any planned exploration of consistency (such as $I^2$ , Kendall's $\tau$ ) | Yes<br>P7, L32-38     |
|                                    | 15c | Describe any proposed additional analyses (such as sensitivity or subgroup analyses, meta-regression)                                                                                                                                            | Yes<br>P7, L38-42     |
|                                    | 15d | If quantitative synthesis is not appropriate, describe the type of summary planned                                                                                                                                                               | Yes<br>P7, L42-P8, L1 |
| Meta-bias(es)                      | 16  | Specify any planned assessment of meta-bias(es) (such as publication bias across studies, selective reporting within studies)                                                                                                                    | Yes<br>P8, L4-7       |
| Confidence in cumulative evidence  | 17  | Describe how the strength of the body of evidence will be assessed (such as GRADE)                                                                                                                                                               | Yes<br>P8, L9-13      |

1  
2  
3  
4  
5  
6  
7  
8  
9  
10  
11  
12  
13  
14  
15  
16  
17  
18  
19  
20  
21  
22  
23  
24  
25  
26  
27  
28  
29  
30  
31  
32  
33  
34  
35  
36  
37  
38  
39  
40  
41  
42  
43  
44  
45  
46

**\*It is strongly recommended that this checklist be read in conjunction with the PRISMA-P Explanation and Elaboration (cite when available) for important clarification on the items. Amendments to a review protocol should be tracked and dated. The copyright for PRISMA-P (including checklist) is held by the PRISMA-P Group and is distributed under a Creative Commons Attribution Licence 4.0.**

*From: Shamseer L, Moher D, Clarke M, Ghersi D, Liberati A, Petticrew M, Shekelle P, Stewart L, PRISMA-P Group. Preferred reporting items for systematic review and meta-analysis protocols (PRISMA-P) 2015: elaboration and explanation. BMJ. 2015 Jan 2;349(jan02 1):g7647.*

For peer review only

**Supplementary Table 2** Search strategy for Medline

1. carotid artery diseases/ or carotid artery thrombosis/ or carotid stenosis/
2. carotid arteries/ or carotid artery, common/ or carotid artery, external/ or carotid artery, internal/
3. constriction, pathologic/
4. 2 and 3
5. (carotid adj5 (stenosis or thrombo\$ or disease\$ or arter\$ narrow\$ or plaque\$ or arterioscler\$ or atheroscler\$)).tw.
6. 1 or 4 or 5
7. Endarterectomy/
8. Vascular Surgical Procedures/
9. 7 or 8
10. 6 and 9
11. Endarterectomy, Carotid/
12. (carotid adj5 (endarterectomy or surgery)).tw.
13. cea.tw.
14. 10 or 11 or 12 or 13
15. angioplasty/ or angioplasty, balloon/ or angioplasty, balloon, laser-assisted/ or angioplasty, laser/
16. Stents/
17. (angioplasty or stent\$ or endovascular).tw.
18. (balloon adj5 (dilat\$ or catheter\$)).tw.
19. ((endoluminal or transluminal) adj5 repair\$).tw.
20. (revasculariz\$ or recanali\$).tw.
21. 15 or 16 or 17 or 18 or 19 or 20
22. (trans adj5 (carotid or cervical)).tw.
23. 21 and 22
24. 14 and 23

## Supplementary file 3

### NEWCASTLE - OTTAWA QUALITY ASSESSMENT SCALE CASE CONTROL STUDIES

Note: A study can be awarded a maximum of one star for each numbered item within the Selection and Exposure categories. A maximum of two stars can be given for Comparability.

#### Selection

- 1) Is the case definition adequate?
  - a) yes, with independent validation \*
  - b) yes, eg record linkage or based on self reports
  - c) no description
- 2) Representativeness of the cases
  - a) consecutive or obviously representative series of cases \*
  - b) potential for selection biases or not stated
- 3) Selection of Controls
  - a) community controls \*
  - b) hospital controls
  - c) no description
- 4) Definition of Controls
  - a) no history of disease (endpoint) \*
  - b) no description of source

#### Comparability

- 1) Comparability of cases and controls on the basis of the design or analysis
  - a) study controls for \_\_\_\_\_ (Select the most important factor.) \*
  - b) study controls for any additional factor \* (This criteria could be modified to indicate specific control for a second important factor.)

#### Exposure

- 1) Ascertainment of exposure
  - a) secure record (eg surgical records) \*
  - b) structured interview where blind to case/control status \*
  - c) interview not blinded to case/control status
  - d) written self report or medical record only
  - e) no description
- 2) Same method of ascertainment for cases and controls
  - a) yes \*
  - b) no
- 3) Non-Response rate
  - a) same rate for both groups \*
  - b) non respondents described
  - c) rate different and no designation

## NEWCASTLE - OTTAWA QUALITY ASSESSMENT SCALE COHORT STUDIES

Note: A study can be awarded a maximum of one star for each numbered item within the Selection and Outcome categories. A maximum of two stars can be given for Comparability

### Selection

#### 1) Representativeness of the exposed cohort

- a) truly representative of the average \_\_\_\_\_ (describe) in the community \*
- b) somewhat representative of the average \_\_\_\_\_ in the community \*
- c) selected group of users eg nurses, volunteers
- d) no description of the derivation of the cohort

#### 2) Selection of the non exposed cohort

- a) drawn from the same community as the exposed cohort \*
- b) drawn from a different source
- c) no description of the derivation of the non exposed cohort

#### 3) Ascertainment of exposure

- a) secure record (eg surgical records) \*
- b) structured interview \*
- c) written self report
- d) no description

#### 4) Demonstration that outcome of interest was not present at start of study

- a) yes \*
- b) no

### Comparability

#### 1) Comparability of cohorts on the basis of the design or analysis

- a) study controls for \_\_\_\_\_ (select the most important factor) \*
- b) study controls for any additional factor \* (This criteria could be modified to indicate specific control for a second important factor.)

### Outcome

#### 1) Assessment of outcome

- a) independent blind assessment \*
- b) record linkage \*
- c) self report
- d) no description

#### 2) Was follow-up long enough for outcomes to occur

- a) yes (select an adequate follow up period for outcome of interest) \*
- b) no

#### 3) Adequacy of follow up of cohorts

- a) complete follow up - all subjects accounted for \*
- b) subjects lost to follow up unlikely to introduce bias - small number lost - > \_\_\_\_ % (select an adequate %) follow up, or description provided of those lost) \*
- c) follow up rate < \_\_\_\_ % (select an adequate %) and no description of those lost
- d) no statement



1  
2  
3  
4  
5  
6  
7  
8  
9  
10  
11  
12  
13  
14  
15  
16  
17  
18  
19  
20  
21  
22  
23  
24  
25  
26  
27  
28  
29  
30  
31  
32  
33  
34  
35  
36  
37  
38  
39  
40  
41  
42  
43  
44  
45  
46  
47  
48  
49  
50  
51  
52  
53  
54  
55  
56  
57  
58  
59  
60

Note: 1 \* means 1 point, and studies with scores of 0–4 points were identified as low quality and 5–9 points as high quality and only high-quality literature will be in our analysis.

For peer review only

# BMJ Open

## Safety and Efficacy of Transcarotid Artery Revascularisation Versus Carotid Endarterectomy: Protocol for a Systematic Review and Meta-analysis Study

|                                 |                                                                                                                                                                                                                                                                                                                                                                                                                                                                                                                                                                                                                                                                                                                                        |
|---------------------------------|----------------------------------------------------------------------------------------------------------------------------------------------------------------------------------------------------------------------------------------------------------------------------------------------------------------------------------------------------------------------------------------------------------------------------------------------------------------------------------------------------------------------------------------------------------------------------------------------------------------------------------------------------------------------------------------------------------------------------------------|
| Journal:                        | <i>BMJ Open</i>                                                                                                                                                                                                                                                                                                                                                                                                                                                                                                                                                                                                                                                                                                                        |
| Manuscript ID                   | bmjopen-2020-043039.R1                                                                                                                                                                                                                                                                                                                                                                                                                                                                                                                                                                                                                                                                                                                 |
| Article Type:                   | Protocol                                                                                                                                                                                                                                                                                                                                                                                                                                                                                                                                                                                                                                                                                                                               |
| Date Submitted by the Author:   | 06-Feb-2021                                                                                                                                                                                                                                                                                                                                                                                                                                                                                                                                                                                                                                                                                                                            |
| Complete List of Authors:       | Bai, Xuesong; Xuanwu Hospital, Department of Neurosurgery<br>Zhang, Xiao; Xuanwu Hospital, Department of Neurosurgery<br>Yang, Wuyang; Johns Hopkins University School of Medicine, Neurosurgery<br>Wang, Tao; Xuanwu Hospital, Department of Neurosurgery<br>Wang, Yan; China Medical University, No.77 Puhe Road, Shenyang North New Area, Shenyang, Liaoning Province, P.R. China<br>Feng, Yao; Xuanwu Hospital, Department of Neurosurgery<br>Yang, Kun; Xuanwu Hospital, Department of Evidence-based Medicine<br>Wang, Xue; Xuanwu Hospital, Medical Library<br>Ma, Yan; Xuanwu Hospital, Department of Neurosurgery<br>Jiao, Liqun; Xuanwu Hospital, Department of Neurosurgery and Department of Interventional Neuroradiology |
| <b>Primary Subject Heading</b>: | Neurology                                                                                                                                                                                                                                                                                                                                                                                                                                                                                                                                                                                                                                                                                                                              |
| Secondary Subject Heading:      | Neurology                                                                                                                                                                                                                                                                                                                                                                                                                                                                                                                                                                                                                                                                                                                              |
| Keywords:                       | Stroke < NEUROLOGY, NEUROSURGERY, STROKE MEDICINE                                                                                                                                                                                                                                                                                                                                                                                                                                                                                                                                                                                                                                                                                      |
|                                 |                                                                                                                                                                                                                                                                                                                                                                                                                                                                                                                                                                                                                                                                                                                                        |

SCHOLARONE™  
Manuscripts



I, the Submitting Author has the right to grant and does grant on behalf of all authors of the Work (as defined in the below author licence), an exclusive licence and/or a non-exclusive licence for contributions from authors who are: i) UK Crown employees; ii) where BMJ has agreed a CC-BY licence shall apply, and/or iii) in accordance with the terms applicable for US Federal Government officers or employees acting as part of their official duties; on a worldwide, perpetual, irrevocable, royalty-free basis to BMJ Publishing Group Ltd ("BMJ") its licensees and where the relevant Journal is co-owned by BMJ to the co-owners of the Journal, to publish the Work in this journal and any other BMJ products and to exploit all rights, as set out in our [licence](#).

The Submitting Author accepts and understands that any supply made under these terms is made by BMJ to the Submitting Author unless you are acting as an employee on behalf of your employer or a postgraduate student of an affiliated institution which is paying any applicable article publishing charge ("APC") for Open Access articles. Where the Submitting Author wishes to make the Work available on an Open Access basis (and intends to pay the relevant APC), the terms of reuse of such Open Access shall be governed by a Creative Commons licence – details of these licences and which [Creative Commons](#) licence will apply to this Work are set out in our licence referred to above.

Other than as permitted in any relevant BMJ Author's Self Archiving Policies, I confirm this Work has not been accepted for publication elsewhere, is not being considered for publication elsewhere and does not duplicate material already published. I confirm all authors consent to publication of this Work and authorise the granting of this licence.

1  
2  
3  
4 **Safety and Efficacy of Transcarotid Artery Revascularisation Versus**  
5  
6  
7 **Carotid Endarterectomy: Protocol for a Systematic Review and**  
8  
9 **Meta-analysis Study**  
10

11 Xuesong Bai<sup>1,2#</sup>, Xiao Zhang<sup>1,2#</sup>, Wuyang Yang<sup>3#</sup>, Tao Wang<sup>1,2</sup>, Yan Wang<sup>4</sup>, Yao  
12 Feng<sup>1,2</sup>, Kun Yang<sup>5</sup>, Xue Wang<sup>6</sup>, Yan Ma<sup>1,2\*</sup>, Liqun Jiao<sup>1,2,7\*</sup>  
13  
14  
15

16 **\*Correspondence to**

17 Liqun Jiao; e-mail: [liqunjiao@sina.cn](mailto:liqunjiao@sina.cn); telephone: +86-010-83198277; fax numbers:  
18 +86-010-83199233; China International Neuroscience Institute (China-INI);  
19 Department of Neurosurgery and Department of Interventional Neuroradiology,  
20 Xuanwu Hospital, Capital Medical University, No. 45 Changchun Street, Xicheng  
21 District, Beijing, China (100053).  
22  
23

24 Yan Ma; e-mail: [leavesyan@sina.com](mailto:leavesyan@sina.com); telephone: +86-010-83198277; fax numbers:  
25 +86-010-83199233; China International Neuroscience Institute (China-INI);  
26 Department of Neurosurgery, Xuanwu Hospital, Capital Medical University, No. 45  
27 Changchun Ave, Xicheng District, Beijing, China (100053).  
28  
29

30 <sup>1</sup> China International Neuroscience Institute (China-INI), Beijing, China

31 <sup>2</sup> Department of Neurosurgery, Xuanwu Hospital, Capital Medical University, No. 45  
32 Changchun Street, Beijing, China

33 <sup>3</sup> Department of Neurosurgery, Johns Hopkins University School of Medicine,  
34 Baltimore, USA

35 <sup>4</sup> China Medical University, No.77 Puhe Road, Shenyang North New Area, Shenyang,  
36 Liaoning Province, China

37 <sup>5</sup> Department of Evidence-Based Medicine, Xuanwu Hospital, Capital Medical  
38 University, No. 45 Changchun Street, Beijing, China

39 <sup>6</sup> Medical Library, Xuanwu Hospital, Capital Medical University, No. 45 Changchun  
40 Street, Beijing, China

41 <sup>7</sup> Department of Interventional Neuroradiology, Xuanwu Hospital, Capital Medical  
42 University, Beijing, China

43  
44  
45  
46  
47  
48 # These authors contributed equally to this article and are co-first authors.  
49

50  
51 **Word count: 2407**  
52  
53  
54  
55  
56  
57  
58  
59  
60

## ABSTRACT

**Introduction:** In recent years, the transcarotid artery revascularisation (TCAR) with flow reversal technique has been developed to treat carotid artery stenosis. The superiority of TCAR over transfemoral carotid artery stenting has been demonstrated. However, the safety and efficacy of TCAR and carotid endarterectomy remain unclear. This study aims to introduce a protocol for a systematic review and meta-analysis to compare the morbidity and mortality rates between TCAR and carotid endarterectomy in the treatment of atherosclerotic carotid artery stenosis.

**Methods and analysis:** This protocol was drafted using the Preferred Reporting Items for Systematic Reviews and Meta-Analysis Protocols statement. Herein, major databases will be searched, including Medline, Web of Science, Embase, and the Cochrane Library, and randomised controlled trials and high-quality observational studies will be included. We will screen all studies published from January 2000 to March 2021. Bias risk will be evaluated using the Cochrane Collaboration criteria or Methodological Index for Non-randomised Studies criteria, depending on the study type. Two reviewers will select eligible studies and extract the data independently. The primary outcome will include stroke or death during the perioperative period and follow-up. Subgroup and sensitivity analyses will be performed to explore any potential sources of heterogeneity. Specific results will be described in a narrative form when available eligible studies are insufficient for meta-analysis. Publication bias will be assessed using a funnel plot.

**Ethics and dissemination:** This study will summarise and analyse the existing literature; hence, ethics approval will not be required. The final results may be published at a relevant academic conference or in a journal.

**PROSPERO registration number:** 42020178691,

**Keywords** carotid artery stenosis, transcarotid artery revascularization, carotid endarterectomy, systematic review, meta-analysis

**Strengths and limitations of this study**

- This systematic review and meta-analysis will summarise the current literature and compare the primary and secondary outcomes between transcrotid artery revascularisation and carotid endarterectomy.
- This study will also compare the outcomes based on studies that eliminate baseline discrepancies in comorbidities and anatomic factors.
- Observational studies will be included, with the aim of providing adequate statistical power to evaluate primary and secondary outcomes.
- The inclusion of observational studies will increase the risk of bias, but our assessments and methods will be meticulous to ensure the accuracy of our results.
- Subgroup and sensitivity analyses will be conducted if the level of heterogeneity is high.

## INTRODUCTION

Stroke is a major cause of mortality and morbidity globally,<sup>1</sup> and carotid artery disease is the major pathophysiological process leading to stroke.<sup>2</sup> Carotid endarterectomy (CEA) has been the gold standard surgical intervention to treat atherosclerotic carotid artery stenosis for many decades.<sup>2-3</sup> However, with the rapid development of endovascular techniques, carotid artery stenting (CAS) has been considered as a less-invasive intervention and an effective alternative to CEA. However, during traditional approaches with transfemoral carotid artery stenting (TFCAS), a sheath position distal to the common carotid artery (CCA) is often required for placement of embolic protection devices. This approach entails traversing the aorta, aortic arch, and culprit lesion at the CCA bifurcation crossed by a wire and embolic protection device delivery catheter, which may increase the risk of plaque rupture and result in an emboli shower during distal access.<sup>4</sup> Thus, TFCAS may paradoxically lead to a higher periprocedural stroke risk than CEA.<sup>2,5</sup>

In recent years, a new technique- transcrotid artery revascularisation (TCAR) with flow reversal has been developed to treat carotid artery stenosis<sup>4,6-8</sup>; this involves direct carotid access via a small incision at the base of the neck. This cervical approach has many advantages: it avoids catheter manipulation in the aortic arch, supra-aortic vessels, and CCA, thereby decreasing the risk of cerebral emboli. Additionally, it uses a flow reversal system to synergistically reduce perioperative embolic stroke risks. With the aforementioned advantages, the superiority of TCAR over TFCAS has been clearly demonstrated in a series of studies.<sup>8,9</sup>

Nevertheless, high-level evidence regarding outcome comparison between TCAR and CEA, which is the gold standard in the treatment of carotid stenosis, is lacking. Although previous meta-analyses showed that TCAR had a similar 30-day risk of stroke/myocardial infarction (MI)/death and a significantly lower risk of cranial nerve injury when compared with CEA,<sup>10,11</sup> the evidence was synthesised in the context of a limited number of studies and a lack of long-term results. Since the last meta-analysis, numerous new study outcomes beyond 30 days after surgery have been published, which warrant a repeat systematic review incorporating these results.<sup>8,12</sup> In addition, TCAR was shown to have a shorter operative time than CEA in some studies,<sup>4,12,13</sup> but this was not analysed in either meta-analyses.<sup>10,11</sup> In addition, patients were usually considered for TCAR when they were regarded as high-risk CEA candidates because of comorbidities such as chronic renal disease or coronary artery disease.<sup>10</sup> Thus, the results of previous meta-analyses could not be generalised to patients with standard surgical risk.<sup>10,11</sup> Therefore, the comparative safety and efficacy between TCAR and CEA needs to be further analysed based on studies with acceptable treatment equipoise between the two interventions.<sup>4,12</sup>

This systematic review and meta-analysis will summarise the current literature and compare both the primary and secondary outcomes between the two modalities in the

1  
2  
3 treatment of atherosclerotic carotid artery stenosis. We anticipate the provision of  
4 valuable clinical evidence for decision-making processes in treatment selection for  
5 patients with carotid artery stenosis.  
6  
7  
8

## 9 **METHODS AND ANALYSIS**

10  
11 This systematic review and meta-analysis was registered in the International  
12 Prospective Register of Systematic Reviews (PROSPERO registration number: CRD  
13 42020178691), and the protocol was conducted in accordance with the Preferred  
14 Reporting Items for Systematic Review and Meta-Analysis Protocols (Supplement  
15 Table 1).<sup>14</sup> If any changes were made to this protocol, PROSPERO registration  
16 information will be updated in a timely fashion.  
17  
18  
19

### 20 **Inclusion criteria for the selection study**

#### 21 **Participants**

22 We will include adult participants (age  $\geq 18$  years old) with atherosclerotic carotid artery  
23 stenosis, who were diagnosed using carotid ultrasonography, computed tomography  
24 angiography, magnetic resonance angiography or digital subtraction angiography, and  
25 treated with TCAR or CEA. We will exclude participants when one of the following  
26 criteria is met: age under 18 years; carotid artery stenosis due to nonatherosclerotic  
27 aetiologies, such as vasculitis, radiation, vasospasm and fibromuscular dysplasia; and  
28 missing or unclear clinical, imaging, or follow-up data.  
29  
30  
31  
32

#### 33 **Primary Intervention of Interest**

34 The primary intervention of interest will be TCAR with flow reversal for atherosclerotic  
35 carotid artery stenosis. TCAR is a type of CAS performed through direct carotid access  
36 via a small incision at the base of the neck. A micropuncture set is used to perform  
37 arterial puncture, and the guidewire and arterial sheath are passed through it. Venous  
38 access can be performed via the common femoral vein or internal jugular vein.<sup>15 16</sup> Then,  
39 the common femoral vein is punctured and sheath insertion is performed. Connection  
40 of the sheaths with a 'flow controller' is conducted to complete the circuit. Blood  
41 reversal is achieved by occlusion of the proximal to the arterial puncture site, and the  
42 flow controller can thus regulate the blood flow.<sup>10 17</sup>  
43  
44  
45  
46  
47

#### 48 **Comparison Intervention**

49 The comparison intervention will involve CEA, which includes primary closure CEA  
50 and eversion CEA, with or without shunt and arterioplasty.  
51

#### 52 **Outcome**

53 At least one of the following items will be reported.

#### 54 **Primary outcomes:**

- 55 1. Stroke or death during the perioperative (within 30 days) period
  - 56 2. Stroke or death during follow-up (such as 1 year and 2 years) period
- 57  
58  
59  
60



We will classify the causes of stroke or death as either culprit lesion-induced, non-culprit lesion-induced, or non-vascular.

Secondary outcomes:

1. Operative duration, cranial nerve injury, MI, transient ischaemic attacks (TIAs), haematoma and intracranial haemorrhage during the perioperative period
2. MI, transient ischaemic attacks, haematoma, intracranial haemorrhage and restenosis during the follow-up period beyond 30 days

Studies

Studies included in the systematic review will be randomised controlled trials (RCTs) and high-quality observational studies, including case-control or cohort studies. Observational studies will be included to minimise type II error caused by lack of statistical power due to the limited number of RCTs.<sup>5 18</sup> Conference abstracts, case reports and case series (no more than 10 patients) will be excluded.

### Search strategy

A literature search will be performed using the following main databases: Medline, Embase, Web of Science, and the Cochrane Library. We will search and screen studies published between January 2000 and March 2021. An explicit search strategy will be constructed for each database using the following related terms: 'carotid artery stenosis', 'carotid endarterectomy', 'transcarotid artery', 'transcervical', 'revascularization'. Additionally, ClinicalTrials.gov will be searched for ongoing studies to ensure that we include all eligible data. The search strategy for Medline was drafted and revised in accordance with the standards of the search strategy checklist<sup>19</sup> (Supplementary Table 2, search strategy for Medline).

### Data selection and analysis

Study selection

Two independent reviewers (YW and XW) will screen all the results after searching the databases for the selection of eligible studies. First, the titles, keywords, and abstracts will be screened by reviewers, and all irrelevant studies will be ruled out. Second, reviewers will evaluate the eligible studies from the remaining studies by reading the full articles. We will then document the causes of all the included and excluded studies. If conflicts occur as a result, reconciliation with consultation from a third reviewer (TW) will be sought.

Data extraction and management

EndNote X7 (Clarivate Analytics, Philadelphia, USA) will be used to manage the included studies. The data extraction will be independently conducted by two reviewers (YW and XW) on the basis of a standardised data extraction form.<sup>20</sup> The extracted information is as follows:

1. Study characteristics: type of study, authors, year of publication, location, sample size, and number of procedures

2. Patient characteristics: mean age, age range, sex, medical history, symptom status, and anatomic characteristics
3. Operative characteristics: type of treatment, anaesthesia type, and use of an anticoagulant
4. Data of outcomes: number of cases with aforementioned outcomes, number of participants, and follow-up time

Discrepancies in data extraction between the two reviewers will be settled with a discussion. For missing or unclear information, we will try to contact the corresponding authors via email. If there are no responses after two emails, we will exclude this study from the meta-analysis and record this case in the Preferred Reporting Items for Systematic Review and Meta-Analysis flow chart.

#### Bias risk assessment

Two independent reviewers (YW and KY) will assess the bias risk of the included studies. Cochrane Collaboration criteria and Methodological Index for Non-randomised Studies criteria will be performed to assess the bias risk of RCTs and observational studies, respectively.<sup>21-23</sup> The methodological quality and synthesis of case series and case reports will be used for case series.<sup>24</sup> Each domain of included studies will be given a score based on the bias risk. The level of bias risk will be ranked as high, unclear or low. Any disagreements will be discussed by the two reviewing authors, and a group discussion will be organised if necessary.

#### Heterogeneity assessment

$\chi^2$  test and  $I^2$  statistics will be used to measure the heterogeneity before any outcome is pooled.<sup>25,26</sup> We will assign the degree of low, moderate and high heterogeneity to the  $I^2$  statistic of 25%, 50%, and 75%.<sup>25,27</sup>

#### Measures of treatment effect and data synthesis

Both primary and secondary outcomes between TCAR and CEA will be compared not only based on all eligible studies, but also on studies eliminating baseline discrepancy of comorbidities and anatomic factors to minimise selection bias.

If the effect size is sufficient (more than two included studies), meta-analyses will be performed for the pooled results of the included studies. Odds ratios with 95% confidence intervals will be used to present the treatment effect for outcomes reported in dichotomous form. For continuous data, we will report the mean differences with 95% confidence intervals. The level of statistical significance is at  $P < 0.05$ . If the included studies are associated with different characteristics, such as differences in included patients, treatment, and follow-up, a random-effects model will be used. In contrast, a fixed effect model will be performed.<sup>28</sup> If there is moderate to substantial heterogeneity ( $I^2 > 50\%$ ) and sufficient studies (at least 10), subgroup analyses will be performed to examine the potential sources of heterogeneity, which will include characteristics of the patients, treatments, and clinical outcomes. For instance, one can expect a difference

1  
2  
3 between symptomatic and asymptomatic participants, and we will therefore divide  
4 them into two groups and analyse the safety and efficacy outcomes of either group of  
5 participants. Sensitivity analysis will also be utilised to appreciate studies with a high  
6 risk of bias through step-wise exclusion of studies and observation of combined bias in  
7 the remaining studies. Meta-regression analysis will be performed on the condition that  
8 there are at least 10 included studies. In cases where data are insufficient and meta-  
9 analysis is infeasible, the sole narrative presentation of the study results will be  
10 presented. STATA (version 14, StataCorp LLC, USA) will be used as a tool for all  
11 statistical analyses.  
12  
13  
14  
15  
16

#### 17 Publication bias assessment

18 The trial protocols will be checked to assess the publication bias of the eligible studies.  
19 Provided that more than 10 studies are included, publication bias will be assessed by  
20 visualisation of the funnel plot. In addition, Egger's intercept and Begg and  
21 Mazumdar's test will also be used to assess publication bias.  
22  
23  
24

#### 25 Assessment of pooled effect estimates

26 For pooled effect estimates, we will use the Strengthening the Reporting of  
27 Observational Studies in Epidemiology statement<sup>29</sup> and the Grading of  
28 Recommendations Assessment, Development and Evaluation system for assessment of  
29 observational studies and RCTs, respectively.<sup>30</sup>  
30  
31  
32

#### 33 Patient and public involvement

34 Patients and the public will not be involved in the process of this systematic review and  
35 meta-analysis, as this study will be conducted solely on the basis of published data.  
36  
37

## 38 DISCUSSION

39  
40 This study aims to summarise the current literature and compare both primary and  
41 secondary outcomes between TCAR and CEA in the treatment of atherosclerotic  
42 carotid artery stenosis. TCAR with flow reversal has recently been developed for the  
43 treatment of carotid artery stenosis. It is worth noting that despite many proposed  
44 advantages compared with TFCAS, TCAR may also have inherent disadvantages, such  
45 as anatomical restrictions from short thick necks and the need for at least 8 minutes of  
46 flow reversal, which will not be tolerated by some patients undergoing carotid  
47 revascularization.<sup>7</sup> Many studies were performed under the supervision of the Silk Road  
48 Medical company.<sup>31</sup> However, the safety and efficacy of TCAR and the gold standard  
49 for treatment of CEA remains uncertain. In addition, a systematic review and meta-  
50 analysis of high-quality studies that eliminate the baseline discrepancy of comorbidities  
51 and anatomic factors will be performed for the decision-making process for carotid  
52 artery stenosis patients.  
53  
54  
55  
56  
57  
58  
59  
60

## ETHICS AND DISSEMINATION

There is no need for ethical approval because primary data will not be obtained. The systematic review will be presented at international conferences and published in peer-reviewed journals.

**Abbreviations:** CEA, Carotid endarterectomy; CAS, carotid artery stenting; TFCAS, transfemoral carotid artery stenting; CCA, common carotid artery; EPDs, embolic protection devices; TCAR, transcarotid artery revascularization; CNI, cranial nerve injury; PROSPERO, International Prospective Register of Systematic Reviews; PRISMA-P, Preferred Reporting Items for Systematic Reviews and Meta-Analysis Protocols; CTA, computed tomography angiography; MRA, magnetic resonance angiography; DSA, digital subtraction angiography; MI, myocardial infarction; TIAs, transient ischemic attacks; RCTs, randomized controlled trials; MINORS, Methodological index for non-randomized studies criteria; OR, odds ratio; CIs, confidence intervals; STROBE, Strengthening the Reporting of Observational Studies in Epidemiology statement; GRADE, Grading of Recommendations Assessment, Development and Evaluation system.

**Acknowledgements** We would like to thank Editage ([www.editage.cn](http://www.editage.cn)) for English language editing.

**Contributors** XB, XZ, LJ and YM contributed to the initial idea for this study. XW, TW, YW and YF developed and revised the search strategy. XB, XZ, and WY completed the study design. LJ and YM contributed to consults about clinical issues. XB, XZ and WY contributed to the original draft. LJ, YM, XB, XZ, WY, TW and KY contributed to the revision of the draft. XB, XZ and WY contributed equally to this article. All of the authors approved the final work prior to submission.

**Funding statement** This work was supported by the National Key Research and Development Project (2016YFC1301703) and the Beijing Scientific and Technologic Project (Z201100005520019). The funder has no role in study design, data analysis and writing the manuscript.

**Competing interests** None declared.

**Patient consent** Not required.

## REFERENCES

1. Powers WJ, Rabinstein AA, Ackerson T, et al. 2018 Guidelines for the Early Management of Patients With Acute Ischemic Stroke: A Guideline for Healthcare Professionals From the American Heart Association/American Stroke Association. *Stroke* 2018;49(3):e46-e110.
2. Carotid artery stenting compared with endarterectomy in patients with symptomatic carotid stenosis (International Carotid Stenting Study): an interim analysis of a randomised controlled trial. *The Lancet* 2010;375(9719):985-97.
3. Feng Y, Bai X, Wang T, et al. Thirty-day outcomes of carotid endarterectomy in the elderly: A 17-year single-center study. *J Clin Neurosci* 2020.
4. Kashyap VS, King AH, Foteh MI, et al. A multi-institutional analysis of transcarotid artery revascularization compared to carotid endarterectomy. *Journal of vascular surgery* 2019;70(1):123-29.
5. Feng Y, Li L, Bai X, et al. Risk factors for new ischaemic cerebral lesions after carotid artery stenting: protocol for a systematic review and meta-analysis. *BMJ open* 2019;9(8):e030025.
6. Alvarez B, Ribo M, Maeso J, et al. Transcervical carotid stenting with flow reversal is safe in octogenarians: a preliminary safety study. *J Vasc Surg* 2008;47(1):96-100.
7. Plessers M, Van Herzeele I, Hemelsoet D, et al. Transcervical Carotid Stenting With Dynamic Flow Reversal Demonstrates Embolization Rates Comparable to Carotid Endarterectomy. *J Endovasc Ther* 2016;23(2):249-54.
8. Dakour-Aridi H, Kashyap VS, Wang GJ, et al. The impact of age on in-hospital outcomes after transcarotid artery revascularization, transfemoral carotid artery stenting, and carotid endarterectomy. *Journal of vascular surgery* 2020.

- 1  
2  
3  
4 9. Schermerhorn ML, Liang P, Eldrup-Jorgensen J, et al. Association of Transcarotid Artery  
5  
6 Revascularization vs Transfemoral Carotid Artery Stenting With Stroke or Death Among  
7  
8 Patients With Carotid Artery Stenosis. *JAMA* 2019;322(23):2313-22.  
9  
10  
11  
12 10. Conway AM, Nguyen Tran NT, Qato K, et al. Complexity of aortic arch anatomy affects the  
13  
14 outcomes of transcarotid artery revascularization versus transfemoral carotid artery stenting.  
15  
16 *Ann Vasc Surg* 2020.  
17  
18  
19 11. Naazie IN, Cui CL, Osaghae I, et al. A Systematic Review and Meta-Analysis of  
20  
21 Transcarotid Artery Revascularization with Dynamic Flow Reversal Versus Transfemoral  
22  
23 Carotid Artery Stenting and Carotid Endarterectomy. *Annals of vascular surgery* 2020.  
24  
25  
26  
27 12. Yee EJ, Wang SK, Timsina LR, et al. Propensity-Matched Outcomes of Transcarotid Artery  
28  
29 Revascularization Versus Carotid Endarterectomy. *The Journal of surgical research*  
30  
31 2020;252:22-29.  
32  
33  
34  
35 13. Schermerhorn ML, Liang P, Dakour-Aridi H, et al. In-hospital outcomes of transcarotid  
36  
37 artery revascularization and carotid endarterectomy in the Society for Vascular Surgery  
38  
39 Vascular Quality Initiative. *Journal of vascular surgery* 2020;71(1):87-95.  
40  
41  
42  
43 14. Shamseer L, Moher D, Clarke M, et al. Preferred reporting items for systematic review and  
44  
45 meta-analysis protocols (PRISMA-P) 2015: elaboration and explanation. *BMJ (Clinical*  
46  
47 *research ed)* 2015;350:g7647.  
48  
49  
50  
51 15. Matas M, Alvarez B, Ribo M, et al. Transcervical carotid stenting with flow reversal  
52  
53 protection: experience in high-risk patients. *J Vasc Surg* 2007;46(1):49-54.  
54  
55  
56 16. Leal I, Orgaz A, Flores A, et al. A diffusion-weighted magnetic resonance imaging-based  
57  
58 study of transcervical carotid stenting with flow reversal versus transfemoral filter protection.  
59  
60

- 1  
2  
3  
4 *J Vasc Surg* 2012;56(6):1585-90.  
5  
6  
7 17. Luk Y, Chan YC, Cheng SW. Transcarotid Artery Revascularization as a New Modality of  
8  
9 Treatment for Carotid Stenosis. *Annals of vascular surgery* 2020;64:397-404.  
10  
11  
12 18. Bai X, Feng Y, Yang K, et al. Extracranial-intracranial bypass surgery for occlusive  
13  
14 atherosclerotic disease of the anterior cerebral circulation: protocol for a systematic review  
15  
16 and meta-analysis. *Systematic reviews* 2020;9(1):70.  
17  
18  
19 19. Wang T, Wang X, Yang K, et al. Endovascular treatment for symptomatic intracranial artery  
20  
21 stenosis: protocol for a systematic review and network meta-analysis. *BMJ open*  
22  
23 2018;8(7):e022359.  
24  
25  
26 20. Bai X, Feng Y, Li L, et al. Treatment strategies for asymptomatic carotid artery stenosis in  
27  
28 the era of lipid-lowering drugs: protocol for a systematic review and network meta-analysis.  
29  
30 *BMJ open* 2020;10(7):e035094.  
31  
32  
33 21. Higgins J, Green S. Cochrane Handbook for Systematic Reviews of Interventions, Version  
34  
35 5.1.0. The Cochrane Collaboration. 2013  
36  
37  
38 22. Wells GA, Shea B, O'Connell J. The Newcastle-Ottawa Scale (NOS) for Assessing The  
39  
40 Quality of Nonrandomised Studies in Meta-analyses. 2014  
41  
42  
43 23. Slim K, Nini E, Forestier D, et al. Methodological index for non-randomized studies (minors):  
44  
45 development and validation of a new instrument. *ANZ journal of surgery* 2003;73(9):712-6.  
46  
47  
48 24. Murad MH, Sultan S, Haffar S, et al. Methodological quality and synthesis of case series  
49  
50 and case reports. *BMJ evidence-based medicine* 2018;23(2):60-63.  
51  
52  
53 25. Higgins JP, Thompson SG, Deeks JJ, et al. Measuring inconsistency in meta-analyses.  
54  
55  
56 *BMJ (Clinical research ed)* 2003;327(7414):557-60.  
57  
58  
59  
60

- 1  
2  
3  
4 26. Higgins JP, Thompson SG. Quantifying heterogeneity in a meta-analysis. *Statistics in*  
5  
6 *medicine* 2002;21(11):1539-58.  
7  
8  
9 27. Zhang X, Yu Y, Yang K, et al. Clinical outcomes of radiation-induced carotid stenosis: A  
10  
11 systematic review and meta-analysis. *Journal of stroke and cerebrovascular diseases : the*  
12  
13 *official journal of National Stroke Association* 2020;29(8):104929.  
14  
15  
16 28. Cooper HM, Hedges LV, Valentine JC. *The Handbook of Research Synthesis and Meta-*  
17  
18 *Analysis (Second Edition)*2009.  
19  
20  
21 29. von Elm E, Altman DG, Egger M, et al. Strengthening the Reporting of Observational  
22  
23 Studies in Epidemiology (STROBE) statement: guidelines for reporting observational  
24  
25 Studies in Epidemiology (STROBE) statement: guidelines for reporting observational  
26  
27 studies. *BMJ (Clinical research ed)* 2007;335(7624):806-8.  
28  
29  
30 30. Guyatt GH, Oxman AD, Vist GE, et al. GRADE: an emerging consensus on rating quality  
31  
32 of evidence and strength of recommendations. *BMJ (Clinical research ed)*  
33  
34 2008;336(7650):924-6.  
35  
36  
37 31. Coelho A, Prassaparo T, Mansilha A, et al. Critical Appraisal on the Quality of Reporting on  
38  
39 Safety and Efficacy of Transcarotid Artery Stenting With Flow Reversal. *Stroke*  
40  
41 2020;51(9):2863-71.  
42  
43  
44  
45  
46  
47  
48  
49  
50  
51  
52  
53  
54  
55  
56  
57  
58  
59  
60



**Supplementary file 1.** PRISMA-P (Preferred Reporting Items for Systematic review and Meta-Analysis Protocols) 2015 checklist: recommended items to address in a systematic review protocol\*

| Section and topic                 | Item No | Checklist item                                                                                                                                                                                  | Check results     |
|-----------------------------------|---------|-------------------------------------------------------------------------------------------------------------------------------------------------------------------------------------------------|-------------------|
| <b>ADMINISTRATIVE INFORMATION</b> |         |                                                                                                                                                                                                 |                   |
| Title:                            |         |                                                                                                                                                                                                 | P1, L1-10         |
| Identifi-<br>cation               | 1a      | Identify the report as a protocol of a systematic review                                                                                                                                        | Yes               |
| Update                            | 1b      | If the protocol is for an update of a previous systematic review, identify as such                                                                                                              | Yes               |
| Registration                      | 2       | If registered, provide the name of the registry (such as PROSPERO) and registration number                                                                                                      | Yes<br>P2, L39    |
| Authors:                          |         |                                                                                                                                                                                                 |                   |
| Contact                           | 3a      | Provide name, institutional affiliation, e-mail address of all protocol authors; provide physical mailing address of corresponding author                                                       | Yes<br>P1, L12-49 |
| Contri-<br>butions                | 3b      | Describe contributions of protocol authors and identify the guarantor of the review                                                                                                             | Yes<br>P10, L7-13 |
| Amendments                        | 4       | If the protocol represents an amendment of a previously completed or published protocol, identify as such and list changes; otherwise, state plan for documenting important protocol amendments | Yes               |
| Support:                          |         |                                                                                                                                                                                                 | P10, L15-18       |
| Sources                           | 5a      | Indicate sources of financial or other support for the review                                                                                                                                   | Yes               |
| Sponsor                           | 5b      | Provide name for the review funder and/or sponsor                                                                                                                                               | Yes               |

|    |                      |     |                                                                                                                                                                                                                               |              |
|----|----------------------|-----|-------------------------------------------------------------------------------------------------------------------------------------------------------------------------------------------------------------------------------|--------------|
| 1  |                      |     |                                                                                                                                                                                                                               |              |
| 2  |                      |     |                                                                                                                                                                                                                               |              |
| 3  |                      |     |                                                                                                                                                                                                                               |              |
| 4  | Role of              | 5c  | Describe roles of funder(s), sponsor(s), and/or institution(s), if any, in developing the protocol                                                                                                                            | Yes          |
| 5  | sponsor or           |     |                                                                                                                                                                                                                               |              |
| 6  | funder               |     |                                                                                                                                                                                                                               |              |
| 7  | <hr/>                |     |                                                                                                                                                                                                                               |              |
| 8  | <b>INTRODUCTION</b>  |     |                                                                                                                                                                                                                               |              |
| 9  | <hr/>                |     |                                                                                                                                                                                                                               |              |
| 10 | Rationale            | 6   | Describe the rationale for the review in the context of what is already known                                                                                                                                                 | Yes          |
| 11 |                      |     |                                                                                                                                                                                                                               | P4, L16-P5,  |
| 12 |                      |     |                                                                                                                                                                                                                               | 12           |
| 13 | <hr/>                |     |                                                                                                                                                                                                                               |              |
| 14 | Objectives           | 7   | Provide an explicit statement of the question(s) the review will address with reference to participants, interventions, comparators, and outcomes (PICO)                                                                      | Yes          |
| 15 |                      |     |                                                                                                                                                                                                                               | P5, L14-20   |
| 16 | <hr/>                |     |                                                                                                                                                                                                                               |              |
| 17 | <b>METHODS</b>       |     |                                                                                                                                                                                                                               |              |
| 18 | <hr/>                |     |                                                                                                                                                                                                                               |              |
| 19 | Eligibility criteria | 8   | Specify the study characteristics (such as PICO, study design, setting, time frame) and report characteristics (such as years considered, language, publication status) to be used as criteria for eligibility for the review | Yes          |
| 20 |                      |     |                                                                                                                                                                                                                               | P5, L35- P6, |
| 21 |                      |     |                                                                                                                                                                                                                               | L42          |
| 22 | <hr/>                |     |                                                                                                                                                                                                                               |              |
| 23 | Information sources  | 9   | Describe all intended information sources (such as electronic databases, contact with study authors, trial registers or other grey literature sources) with planned dates of coverage                                         | Yes          |
| 24 |                      |     |                                                                                                                                                                                                                               | P6, L44-     |
| 25 |                      |     |                                                                                                                                                                                                                               | L57          |
| 26 | <hr/>                |     |                                                                                                                                                                                                                               |              |
| 27 | Search strategy      | 10  | Present draft of search strategy to be used for at least one electronic database, including planned limits, such that it could be repeated                                                                                    | Yes          |
| 28 |                      |     |                                                                                                                                                                                                                               | Supplemen-   |
| 29 |                      |     |                                                                                                                                                                                                                               | tary Table 2 |
| 30 | <hr/>                |     |                                                                                                                                                                                                                               |              |
| 31 | Study records:       |     |                                                                                                                                                                                                                               |              |
| 32 |                      |     |                                                                                                                                                                                                                               |              |
| 33 | Data management      | 11a | Describe the mechanism(s) that will be used to manage records and data throughout the review                                                                                                                                  | Yes          |
| 34 |                      |     |                                                                                                                                                                                                                               | P7, L17-     |
| 35 |                      |     |                                                                                                                                                                                                                               | L39          |
| 36 |                      |     |                                                                                                                                                                                                                               |              |
| 37 | Selection process    | 11b | State the process that will be used for selecting studies (such as two independent reviewers) through each phase of the review (that is, screening, eligibility and inclusion in meta-analysis)                               | Yes          |
| 38 |                      |     |                                                                                                                                                                                                                               | P7, L3-14    |
| 39 |                      |     |                                                                                                                                                                                                                               |              |
| 40 |                      |     |                                                                                                                                                                                                                               |              |
| 41 |                      |     |                                                                                                                                                                                                                               |              |
| 42 |                      |     |                                                                                                                                                                                                                               |              |
| 43 |                      |     |                                                                                                                                                                                                                               |              |
| 44 |                      |     |                                                                                                                                                                                                                               |              |
| 45 |                      |     |                                                                                                                                                                                                                               |              |
| 46 |                      |     |                                                                                                                                                                                                                               |              |

|                                    |     |                                                                                                                                                                                                                                                  |                   |
|------------------------------------|-----|--------------------------------------------------------------------------------------------------------------------------------------------------------------------------------------------------------------------------------------------------|-------------------|
| Data collection process            | 11c | Describe planned method of extracting data from reports (such as piloting forms, done independently, in duplicate), any processes for obtaining and confirming data from investigators                                                           | Yes<br>P7, L33-39 |
| Data items                         | 12  | List and define all variables for which data will be sought (such as PICO items, funding sources), any pre-planned data assumptions and simplifications                                                                                          | Yes<br>P7, L23-32 |
| Outcomes and prioritization        | 13  | List and define all outcomes for which data will be sought, including prioritization of main and additional outcomes, with rationale                                                                                                             | Yes<br>P6, L14-31 |
| Risk of bias in individual studies | 14  | Describe anticipated methods for assessing risk of bias of individual studies, including whether this will be done at the outcome or study level, or both; state how this information will be used in data synthesis                             | Yes<br>P7, L42-55 |
| Data synthesis                     | 15a | Describe criteria under which study data will be quantitatively synthesized                                                                                                                                                                      | Yes<br>P8, L18-25 |
|                                    | 15b | If data are appropriate for quantitative synthesis, describe planned summary measures, methods of handling data and methods of combining data from studies, including any planned exploration of consistency (such as $I^2$ , Kendall's $\tau$ ) | Yes<br>P8, L25-28 |
|                                    | 15c | Describe any proposed additional analyses (such as sensitivity or subgroup analyses, meta-regression)                                                                                                                                            | Yes<br>P8, L31-43 |
|                                    | 15d | If quantitative synthesis is not appropriate, describe the type of summary planned                                                                                                                                                               | Yes<br>P8, L44-46 |
| Meta-bias(es)                      | 16  | Specify any planned assessment of meta-bias(es) (such as publication bias across studies, selective reporting within studies)                                                                                                                    | Yes<br>P8, L50-55 |
| Confidence in cumulative evidence  | 17  | Describe how the strength of the body of evidence will be assessed (such as GRADE)                                                                                                                                                               | Yes<br>P9, L3-8   |

**\* It is strongly recommended that this checklist be read in conjunction with the PRISMA-P Explanation and Elaboration (cite when available) for important clarification on the items. Amendments to a review protocol should be tracked and dated. The copyright for PRISMA-P (including checklist) is held by the PRISMA-P Group and is distributed under a Creative Commons Attribution Licence 4.0.**

1  
2  
3  
4 From: Shamseer L, Moher D, Clarke M, Ghersi D, Liberati A, Petticrew M, Shekelle P, Stewart L, PRISMA-P Group. Preferred reporting items for systematic review and  
5 meta-analysis protocols (PRISMA-P) 2015: elaboration and explanation. *BMJ*. 2015 Jan 2;349(jan02 1):g7647.  
6  
7  
8  
9  
10  
11  
12  
13  
14  
15  
16  
17  
18  
19  
20  
21  
22  
23  
24  
25  
26  
27  
28  
29  
30  
31  
32  
33  
34  
35  
36  
37  
38  
39  
40  
41  
42  
43  
44  
45  
46

For peer review only

**Supplementary Table 2** Search strategy for Medline

1. carotid artery diseases/ or carotid artery thrombosis/ or carotid stenosis/
2. carotid arteries/ or carotid artery, common/ or carotid artery, external/ or carotid artery, internal/
3. constriction, pathologic/
4. 2 and 3
5. (carotid adj5 (stenosis or thrombo\$ or disease\$ or arter\$ narrow\$ or plaque\$ or arterioscler\$ or atheroscler\$)).tw.
6. 1 or 4 or 5
7. Endarterectomy/
8. Vascular Surgical Procedures/
9. 7 or 8
10. 6 and 9
11. Endarterectomy, Carotid/
12. (carotid adj5 (endarterectomy or surgery)).tw.
13. cea.tw.
14. 10 or 11 or 12 or 13
15. angioplasty/ or angioplasty, balloon/ or angioplasty, balloon, laser-assisted/ or angioplasty, laser/
16. Stents/
17. (angioplasty or stent\$ or endovascular).tw.
18. (balloon adj5 (dilat\$ or catheter\$)).tw.
19. ((endoluminal or transluminal) adj5 repair\$).tw.
20. (revasculariz\$ or recanali\$).tw.
21. 15 or 16 or 17 or 18 or 19 or 20
22. (trans adj5 (carotid or cervical)).tw.
23. 21 and 22
24. 14 and 23
