# Supplementary material for: Safety and efficacy of transcarotid artery revascularisation versus carotid endarterectomy: protocol for a systematic review and meta-analysis study
Source: PubMed Central journal article supplement — BMJ Open. 2021 May 4;11(5):e043039. doi: 10.1136/bmjopen-2020-043039 (PMC8098965; doi:10.1136/bmjopen-2020-043039), 2021-05-04
Supplement: bmjopen-2020-043039supp002.pdf [file bmjopen-2020-043039supp002.pdf]

**Supplementary Table 2** Search strategy for Medline

1. carotid artery diseases/ or carotid artery thrombosis/ or carotid stenosis/
2. carotid arteries/ or carotid artery, common/ or carotid artery, external/ or carotid artery, internal/
3. constriction, pathologic/
4. 2 and 3
5. (carotid adj5 (stenosis or thrombo\$ or disease\$ or arter\$ narrow\$ or plaque\$ or arterioscler\$ or atheroscler\$)).tw.
6. 1 or 4 or 5
7. Endarterectomy/
8. Vascular Surgical Procedures/
9. 7 or 8
10. 6 and 9
11. Endarterectomy, Carotid/
12. (carotid adj5 (endarterectomy or surgery)).tw.
13. cea.tw.
14. 10 or 11 or 12 or 13
15. angioplasty/ or angioplasty, balloon/ or angioplasty, balloon, laser-assisted/ or angioplasty, laser/
16. Stents/
17. (angioplasty or stent\$ or endovascular).tw.
18. (balloon adj5 (dilat\$ or catheter\$)).tw.
19. ((endoluminal or transluminal) adj5 repair\$).tw.
20. (revasculariz\$ or recanali\$).tw.
21. 15 or 16 or 17 or 18 or 19 or 20
22. (trans adj5 (carotid or cervical)).tw.
23. 21 and 22
24. 14 and 23
